# Supplementary material
Source: bioRxiv or medRxiv preprint supplement (https://medrxiv.org/highwire/filestream/93798/field_highwire_adjunct_files/0/2020.05.09.20096511-1.pdf)
Supplement: Supplementary file [file 2020.05.09.20096511-1.pdf]

**Supplementary Table 1: Clinical characteristics of COV cohort**

|                                              |               |
|----------------------------------------------|---------------|
| Characteristic                               | N = 13        |
| Age (years)                                  | 50 (SD =17.3) |
| Male Sex (%N)                                | 54%           |
| Race (%N)                                    |               |
| White                                        | 38%           |
| Black                                        | 54%           |
| Other                                        | 8%            |
| Time since 1st positive Covid-19 test (days) | 11 (IQR 5-29) |
| AKI by KDIGO (%N)                            | 62%           |
| KDIGO Stage 1                                | 25%           |
| KDIGO Stage 2                                | 0             |
| KDIGO Stage 3                                | 75%           |
| Renal Recovery (%N)                          | 38%           |
| Covid-19 treatment features (%N)             |               |
| Need for Renal Replacement Therapy           | 23%           |
| Indwelling Urinary Catheter                  | 69%           |
| ICU Admission                                | 85%           |
| Intubation                                   | 85%           |
| ECMO                                         | 23%           |
| Clinical history (%N)                        |               |
| Baseline CKD                                 | 46%           |
| History of Kidney Transplant                 | 23%           |
| History of DM                                | 54%           |
| On Immunosuppressant                         | 23%           |
